# Supplementary material for: Achieving blood pressure control targets in hypertensive patients of rural China – a pilot randomized trial
Source: Springer Nature journal article supplement (doi:10.1186/s13063-020-04368-1), 2020-06-11
Supplement: MOESM4 [file 18074316]

**Supplemental Table 1 Classes of antihypertensive agents**

| <b>Step</b> | <b>Type of antihypertension drug</b> | <b>Antihypertension drug</b> | <b>Available strengths</b> | <b>Usual dose range per day</b> | <b>Frequency</b> |
|-------------|--------------------------------------|------------------------------|----------------------------|---------------------------------|------------------|
| 1           | Ace inhibitor (ACEI)                 | Enalapril+Folic acid         | 10mg+0.8mg                 | 5.4mg-10.8mg                    | 1-2              |
| 2*          | Diuretic                             | Hydrochlorothiazide          | 12.5mg,25mg                | 12.5-25mg                       | 1                |
| 3*          | Calcium channel blocker (CCB)        | Amlodipine                   | 5mg,10mg                   | 2.5-10mg                        | 1-2              |
| 4           | Beta blocker ( $\beta$ -B)           | Metoprolol                   | 25mg,47.5mg                | 12.5-47.5mg                     | 1-2              |

\*2 or 3 were randomly chosen.

**Supplemental Table 2**

| <b>Group</b> | <b>Office Visit SBP</b> | <b>CASP</b>      | <b><math>\Delta</math>SBP<sup>#</sup></b> |
|--------------|-------------------------|------------------|-------------------------------------------|
| A            | 137.2 $\pm$ 14.9        | 129.1 $\pm$ 13.7 | -7.1 $\pm$ 8.0                            |
| B            | 131.1 $\pm$ 14.0        | 121.4 $\pm$ 15.3 | -9.6 $\pm$ 8.2                            |
| C            | 124.2 $\pm$ 13.7        | 115.1 $\pm$ 13.8 | -9.0 $\pm$ 9.0                            |

**# $\Delta$ SBP = CASP-Office Visit SBP**

A =Standard Group    B=Moderately Intensive Group    C= Intensive Group

**Supplemental Table 3**

| <b>Group</b>  | <b>Current study</b> |                    | <b>Group</b> | <b>SPRINT</b>  | <b>Group</b> | <b>ACCORD</b>  |
|---------------|----------------------|--------------------|--------------|----------------|--------------|----------------|
|               | SBP(Mean) mmHg       | SBP(6 months) mmHg |              | SBP(Mean) mmHg |              | SBP(Mean) mmHg |
| A >140, <=150 | 141.3                | 137.2              | A<=140       | 134.6          | A<=140       | 133.5          |
| B >130, <=140 | 138.4                | 131.1              | B<=120       | 121.5          | B<=120       | 119.3          |
| C <=130       | 134.4                | 124.2              |              |                |              |                |
